# Supplementary material
Source: publisher figshare collection journal article supplement (https://gsapubs.figshare.com/ndownloader/files/31266907)
Supplement: Supplementary file 1 [file 31266907]

## Sheet: Feuil1
Table A1. Stable isotope compositions (O and C) of carbonated samples from the Tasna section.
Sample	Site	Latitude	Longitude	Lithology	Description	δ¹⁸O (‰) (V.SMOW)	δ¹³C (‰) (V.PDB)	⁸⁷Sr/⁸⁶Sr
Tas19_35a	Tasna 1 (southern domain)	46°49'31N	10°14'55E	Serpentinite	Calcite vein in shear zone	14.4892	0.452	0.710738
Tas19_35b					Pervasive calcite in shear zone	14.3178	0.469
Tas19_36					Drusic calcite	13.5034	-0.735	0.710676
Tas19_37					Calcite vein	14.9033	0.269	0.707116
Tas19_38					Calcite vein	15.3333	0.373	0.707043
Tas19_47	Tasna 2 (southern domain)	46°49'39N	10°15'00E		Calcite-rich shear zone	16.5598	-2.145
Tas19_48a					Calcite vein	15.359	-1.31
Tas19_48b					Zone of pervasive carbonation	14.9816	0.184	0.707485
Tas19_48c					Calcite in-filling in serpentinite	15.2917	-1.062	0.707815
Tas19_49					Calcite vein	16.3428	-1.77	0.708245
Tas19_50					Calcite in-filling in serpentinite	16.6064	1.485	0.708478
Tas19_51				Mafic rock	Calcite-rich zone	15.68	-0.742	0.708284
Tas19_52	Tasna 3 (southern domain)	46°49'56N	10°14'54E	Serpentinite	Calcite vein beneath foliated oph.	13.9928	-4.752	0.70997
Tas19_53					Epigenetic calcite in foliated oph.	15.3789	-1.36	0.709733
Tas19_54					Epigenetic calcite in foliated oph.	15.1886	-1.144	0.709842
Tas19_55				Gabbro	Calcite+chlorite vein in shear band	13.9106	-1.87	0.709932
Tas19_56					Chlorite-rich shear band	14.9033	-2.607	0.709009
Tas19_57					Chlorite-rich shear band	15.2828	-1.922	0.709724
Tas19_58					Carbonated foliated gabbro	14.718	-1.843	0.709806
Tas19_59					Gabbro matrix-supported cataclasite	14.9935	-1.75
Tas19_60						14.4159	-2.786	0.709778
Tas19_61						14.9717	-2.008
Tas19_62						14.7349	-1.681	0.709351
Tas19_63						14.8736	-1.947	0.709917
Tas19_64					Calcite vein in gabbro	15.1827	-1.293
Tas19_65						14.9192	-1.607
Tas19_67	Tasna 4 (northern domain)	46°50'11N	10°15'15E	Serpentinite	Calcite-rich shear zone and vein	25.3	0.299	0.707484
Tas19_68a					Calcite vein	17.07	-0.691	0.708044
Tas19_68b					Calcite vein with little pervasive carbonation	19.6687	0.441	0.707451
Tas19_79	Tasna 8 (northern domain)	46°50'20N	10°15'27E		Calcite-rich shear zone	16.8352	1.359	0.707684
Tas19_80					Calcite vein	18.5898	1.045
Tas19_81					Calcite in-filling in serpentinite	24.0784	1.35	0.707609

## Sheet: G49363
Coltat, R., et al., 2021, Moho carbonation at an ocean-continent transition: Geology, https://doi.org/10.1130/G49363.1
